1 **Endochondral bone in an Early Devonian ‘placoderm’ from Mongolia**

2

3 Martin D. Brazeau<sup>1,2</sup>, Sam Giles<sup>2,3,4</sup>, Richard P. Dearden<sup>1,5</sup>, Anna Jerve<sup>1,6</sup>, Y.A.

4 Ariunchimeg<sup>7</sup>, E. Zorig<sup>8</sup>, Robert Sansom<sup>9</sup>, Thomas Guillermé<sup>10</sup>, Marco Castiello<sup>1</sup>

5

6 <sup>1</sup> *Department of Life Sciences, Imperial College London, Silwood Park Campus, Buckhurst*  
7 *Rd, Ascot, SL5 7PY, UK;*

8 <sup>2</sup> *Department of Earth Sciences, Natural History Museum, Cromwell Road, London SW7*  
9 *5BD, UK;*

10 <sup>3</sup> *School of Geography, Earth and Environmental Sciences, University of Birmingham,*  
11 *Birmingham, UK;*

12 <sup>4</sup> *Department of Earth Sciences, University of Oxford, South Parks Road, Oxford, OX1 3AN,*  
13 *UK;*

14 <sup>5</sup> *CR2P Centre de Recherche en Paléontologie – Paris, Muséum national d’Histoire*  
15 *naturelle, Sorbonne Universités, CNRS, CP 38, 57 Rue Cuvier, 75231, Paris, Cedex 05,*  
16 *France*

17 <sup>6</sup> *Department of Organismal Biology, Subdepartment of Evolution and Development,*  
18 *Uppsala University, Norbyvägen 18A, 752 36 Uppsala, Sweden;*

19 <sup>7</sup> *Natural History Museum, P.O. Box 46/52, Ulaanbaatar 1420, Mongolia*

20 <sup>8</sup> *Institute of Paleontology, Mongolian Academy of Science, P.O. Box 46/650, S. Danzan*  
21 *Street 3/1, Chingeltei District. Ulaanbaatar 15160, Mongolia;*

22 <sup>9</sup> *School of Earth and Environmental Sciences, University of Manchester, Manchester M13*  
23 *9PT, UK;*

24 <sup>10</sup> *Department of Animal and Plant Sciences, The University of Sheffield, Sheffield S10 2TN,*  
25 *UK;*

26 **Endochondral bone is the main internal skeletal tissue of nearly all osteichthyans<sup>1,2</sup> —**  
27 **the group comprising more than 60,000 living species of bony fishes and tetrapods.**  
28 **Chondrichthyans (sharks and their kin) are the living sister group of osteichthyans and**  
29 **have cartilaginous endoskeletons, long considered the ancestral condition for all jawed**  
30 **vertebrates (gnathostomes)<sup>3,4</sup>. The absence of bone in modern jawless fishes and the**  
31 **absence of endochondral ossification in early fossil gnathostomes appears to lend**  
32 **support to this conclusion. Here we report the discovery of extensive endochondral bone**  
33 **in a new genus of ‘placoderm’-like fish from the Early Devonian (Pragian) of western**  
34 **Mongolia described using x-ray computed microtomography (XR- $\mu$ CT). The fossil**  
35 **consists of a partial skull roof and braincase with anatomical details providing strong**  
36 **evidence of placement in the gnathostome stem group. However, its endochondral space**  
37 **is filled with an extensive network of fine trabeculae resembling the endochondral bone**  
38 **of osteichthyans. Phylogenetic analyses place this new taxon as a proximate sister group**  
39 **of the gnathostome crown. These results provide direct support for theories of**  
40 **generalised bone loss in chondrichthyans<sup>5,6</sup>. Furthermore, they revive theories of a**  
41 **phylogenetically deeper origin of endochondral bone and its absence in**  
42 **chondrichthyans as a secondary condition<sup>7,8</sup>.**

43

#### 44 **Systematic palaeontology**

45

Placodermi M’Coy 1848

46

*Minjinia turgenensis* gen. et sp. nov.

47

48 **Etymology.** Generic name honours the memory of Chuluun Minjin for his extensive  
49 contributions to the Palaeozoic stratigraphy of Mongolia, his enthusiastic support of this  
50 work, and introducing us to the Yamaat River locality. Specific name recognises the  
51 provenance of the fossil from the Turgen region, Uvs aimag of western Mongolia.

52

53 **Holotype.** Institute of Paleontology, Mongolian Academy of Sciences MPC-FH100/9.1, a  
54 partial braincase and skull roof.

55

56 **Type locality.** Turgen Strictly Protected Area, Uvs province, western Mongolia; near the top  
57 of the stratigraphic sequence that occurs between the Tsagaan-Salaat and Yamaat Rivers.

58

59 **Formation and age.** Upper part of Tsagaansalaat Formation, Pragian (Early Devonian)<sup>9,10</sup>.

60

61 **Diagnosis.** ‘placoderm’-grade stem gnathostome with endochondral bone, deep epaxial  
62 muscle cavities flanking a slender occipital ridge, and the following possible autapomorphies:  
63 dermal bones covered in sparsely placed tubercles, penultimate spino-occipital nerve canal  
64 substantially larger in diameter than others.

65

### 66 **Description**

67 MPC-FH100/9.1 consists of a partial braincase and skull roof (Fig. 1). The skull roof is  
68 ornamented with sparsely distributed stellate tubercles resembling those of the Siberian  
69 ‘placoderm’ *Dolganosteus*<sup>11</sup>. Towards the midline of the skull roof, the tubercles are larger  
70 and more pointed, and are more broadly separated from each other by unornamented fields.  
71 The specimen shows signs of extensive post-mortem transport, with angles of the braincase  
72 worn off and much of the skull roof and some of the braincase preserved as a mould.  
73 Individual skull roof ossifications cannot be identified, although this may be due to the  
74 dominantly mouldic preservation. There appears to have been a prominent nuchal plate  
75 eminence comparable to acanthothoracids<sup>12-14</sup>.

76

77 **Endoskeletal tissue.** The braincase of MPC-FH100/9.1 is well ossified, comprising an  
78 external bony sheath filled with an extensive matrix of spongy tissue (Fig. 2a-b; Extended  
79 Data Fig. 1; Supplementary Videos 1 & 2). The trabecles forming this tissue are irregular and  
80 branching, less than 1mm thick and often curved, and resemble most closely the  
81 endochondral tissue of osteichthyans (Fig. 2c-d). As such, we interpret this as endochondral  
82 bone. Notably, this is found in all preserved regions of the braincase, in contrast to the  
83 isolated trabeculae identified as endochondral bone in *Boreaspis*<sup>15</sup> and *Bothriolepis*<sup>16</sup>. The  
84 margins of the braincase, the endocranial walls, and the boundaries of nerve and blood  
85 canals, are formed from a thicker tissue which we interpret as perichondral bone. This  
86 suggests that the endoskeleton of *Minjinia* comprises osteichthyan-like endochondral bone,  
87 with an ossified perichondrium. To address the possible alternative explanation that it is an  
88 aberrant instance of calcified cartilage, we compared the structure of this tissue with rarely-  
89 preserved mineralized cartilage in the stem chondrichthyan *Diplacanthus crassismus*  
90 (National Museums of Scotland specimen NMS 1891.92.334; Fig. 2e-f) observed using  
91 synchrotron tomography. The cancellae within the endochondral tissue of *Minjinia* are  
92 irregular, with a diameter of approximately 1-2mm. This tissue is distinctly unlike the

93 calcified cartilage of *Diplacanthus* in appearance, which consists of a densely packed matrix  
94 of irregularly stacked chondrons between 20-60  $\mu\text{m}$  in diameter.

95

96 **Neurocranium.** The braincase is preserved from the level of the right posterior orbital wall  
97 to the posterior end of the occipital ridge. Occipital glenoid condyles are not preserved, but  
98 broad, flat parachordal plates are present, separated by a midline groove that accommodated a  
99 relatively narrow notochordal tunnel. A transverse fissure spans the basicranial surface at  
100 about mid-length of the preserved portion. It clearly demarcates the anterior margin of the  
101 parachordal plates and may correspond to the ventral cranial fissure of crown-group  
102 gnathostomes. However, unlike in crown gnathostomes, it is traversed by a substantial  
103 anterior extension of the cranial notochord. The courses of the lateral dorsal aortae are  
104 marked by a pair of sulci on the lateral margins of the parachordal plates. A narrow, shallow  
105 sulcus for the efferent hyoid artery is present on the preserved right side of the specimen,  
106 immediately behind the level of the orbit (Fig. 1a).

107         The lateral surface of the braincase is preserved on the right side as a mouldic  
108 impression in the matrix (Fig. 1). A sharply demarcated hyoid fossa is present on the lateral  
109 wall of the otic region (Fig. 1). Posterior to this, a stout but pronounced vagal process with a  
110 pair of rounded eminences likely corresponds to the branchial arch articulations. There is no  
111 evidence for a pair of anterior and posterior divisions to the vagal process, which are  
112 typically seen in other ‘placoderms’. A well-developed ‘placoderm’-like craniospinal  
113 process is absent; its homologous position is instead covered in perichondral bone and  
114 marked by a low ridge (Fig. 1).

115         In posterior view, a tall, narrow median otic ridge is evident and resembles the  
116 morphology of *Romundina*<sup>17</sup> and *Arabosteus*<sup>18</sup>. Similar to these taxa, the median otic ridge is  
117 flanked by two large occipital fossae for the epaxial musculature. The notochordal tunnel is  
118 approximately the same size as or smaller than the foramen magnum, as in ‘placoderms’ and  
119 in contrast with crown-group gnathostomes. A metotic fissure is absent.

120

121 **Endocast.** A partial cranial endocast is preserved, consisting of the hindbrain cavity, partial  
122 midbrain cavity, labyrinth cavities, and posteromedial corner of the orbital region. The two  
123 primary trunk canals of the trigeminal nerve (N.V<sub>1</sub> and N.V<sub>2,3</sub>) are preserved (Fig. 1;  
124 Extended Data Fig. 2). The acoustic (N.VIII) and facial nerve (N.VII) canals share a common  
125 trunk canal behind the trigeminal nerves, as in many other ‘placoderms’<sup>17,19-21</sup>. The  
126 supraorbital branch opens into the rear wall of the orbit and part of its supraorbital course

127 is preserved (Extended Data Figs. 2, 3). A slender branch extends below the labyrinth and  
128 divides into palatine and hyomandibular branches (Extended Data Figs. 2, 3). As in other  
129 ‘placoderm’-grade taxa, the vagus nerve (N. X) trunk canal is very large in diameter and exits  
130 from immediately behind the labyrinth cavity (Fig. 1; Extended Data Fig. 2). The spino-  
131 occipital region resembles other ‘placoderms’ in being extended. At least four spino-occipital  
132 nerve canals are present in a linear series, and the penultimate canal is largest in diameter  
133 (Fig. 1; Extended Data Fig. 2). Intercalating these is a network of occipital artery canals  
134 branching from the dorsal aortae.

135 The skeletal labyrinth is not complete on either side of the specimen, but can mostly  
136 be reconstructed according to the assumption of bilateral symmetry. The most significant  
137 feature is that the labyrinth and endolymphatic cavity are joined to the main endocavity  
138 chamber (Fig. 1). This is a striking contrast to other ‘placoderms’ and closely resembles  
139 crown-group gnathostomes<sup>22</sup>. The endolymphatic canals are elongate and tubular, extending  
140 posterolaterally to reach the skull roof, though external openings cannot be clearly identified.  
141 The anterior semi-circular canal follows the saccular cavity closely as in petalichthyids<sup>23</sup>(Fig.  
142 1; Extended Data Fig. 2). However, the horizontal and posterior canals appear to extend well  
143 away from the saccular chamber (Fig. 1, Extended Data Fig. 2). The dorsal junctions of the  
144 anterior and posterior canals are joined in a crus commune, as in *Romundina*<sup>17</sup> and  
145 *Jagorina*<sup>19</sup>. A sinus superior is absent.

146

#### 147 **Phylogenetic analyses**

148 We conducted phylogenetic analyses under four different protocols: equal weights  
149 parsimony, implied weights parsimony, an unpartitioned Bayesian analysis, and a Bayesian  
150 analysis with characters partitioned by fit determined under implied weights parsimony<sup>24</sup> (see  
151 Extended Data Figs. 4-7). All phylogenetic analyses consistently place *Minjinia* as a stem-  
152 group gnathostome, proximate to the gnathostome crown (Fig. 3, Extended Data Figs 4,5).  
153 Equal weights parsimony recovers *Minjinia* in a position crownward of arthrodires but  
154 outside of a grade consisting of *Entelognathus*, *Ramirosuarezia*, and *Janusiscus*. Under  
155 implied weights, these three taxa move onto the osteichthyan stem and *Minjinia* is placed as  
156 the immediate sister taxon of the gnathostome crown. Under Bayesian analyses, arthrodires  
157 are resolved as more crownward than *Minjinia*. However, the latter analyses fail to recover  
158 arthrodires as a clade and the node uniting them with the crown to the exclusion of *Minjinia*  
159 is extremely weakly supported (posterior probability: 0.52-0.55). Under parsimony, the  
160 crownward position of *Minjinia* is unambiguously supported by the skeletal labyrinth and

161 endolymphatic duct being confluent with the main cranial cavity<sup>22</sup> (Fig. 3). In common with  
162 arthrodires and the gnathostome crown, *Minjinia* possesses a division of the facial nerve deep  
163 to the transverse otic process (Fig. 1; Extended Data Fig. 2). However, *Minjinia* is excluded  
164 from the gnathostome crown group due to the absence of a metotic fissure and a posterior  
165 dorsal fontanelle, and presence of broad, flat parachordal plates expanded behind the saccular  
166 cavity (Fig. 3, Supplementary Information).

167 We undertook ancestral states reconstructions to assess the evolutionary history of  
168 endochondral bone (Fig. 3, Extended Data Figs. 6 & 7). Interestingly, parsimony analysis  
169 fails to recover secondary homology of this trait between *Minjinia* and osteichthyans. The  
170 crownward placement of *Minjinia* is, in fact, based on independent evidence relating to  
171 anatomical features of the braincase and endocast. However, the strict precision of parsimony  
172 reconstructions makes it insensitive to underlying uncertainty. To explore this, we used  
173 likelihood reconstructions and compared the ancestral state reconstructions under equal rates  
174 (ER) and all rates different (ARD) variants of the MkV model on branch-length-rescaled  
175 parsimony trees and Bayesian trees. On the parsimony trees, both models show substantial  
176 non-zero probabilities (0.23 for ER; 0.39 for ARD; Extended Data Table 1) for the presence  
177 of endochondral bone in the common node of *Minjinia* and Osteichthyes (Extended Data Fig.  
178 6) in the parsimony trees. The ARD model shows the best likelihood score and a better AIC  
179 fit for endochondral bone (Extended Data Table 1), favouring repeated losses of this tissue  
180 over multiple gains (see Discussion). The values are substantially lower in the Bayesian trees  
181 (Extended Data Fig. 7, Extended Data Table 1), but this results from the relative positions of  
182 *Minjinia* and arthrodires, which is not well supported in those trees.

183

## 184 Discussion

185 *Minjinia* presents an unusual discovery of extensive endochondral bone in a ‘placoderm’-  
186 grade fish, with repercussions for the phylogenetic origin of this tissue and the problem of  
187 early gnathostome relationships more generally. The vertebrate skeleton is split into two  
188 systems: the exoskeleton (external achondral dermal bones) and endoskeleton (internal  
189 chondral bones)<sup>1</sup>. Dermal bone evolved at least 450 million years ago in jawless stem  
190 gnathostomes, but the endoskeleton in these taxa is not endochondrally ossified (but see  
191 below). More crownward stem gnathostomes (osteostracans and ‘placoderms’) surround their  
192 cartilaginous endoskeleton in a sheath of perichondral bone. Extant chondrichthyans lack  
193 both dermal and perichondral bone, possessing a cartilaginous endoskeleton enveloped by  
194 prismatic calcified cartilage. Endochondral bone, in which the cartilaginous endoskeletal

195 precursor is invaded by and eventually replaced by bone, is widely considered an  
196 osteichthyan apomorphy based on clear prior polarity<sup>3,7,25,26</sup>. However, recent work has cast  
197 doubt on this assertion. The recognition that dermal bone is secondarily lost in  
198 chondrichthyans<sup>27,28</sup> is consonant with prior knowledge of the loss of perichondral bone in  
199 this same lineage<sup>29</sup>. Taken together, this has revived uncertainty about the true phylogenetic  
200 timing of the origin of endochondral ossification<sup>8</sup>.

201 *Minjinia* does not represent the first report of endochondral bone outside of  
202 Osteichthyes. However, it is by far the most extensive and unequivocal example, and raises  
203 explicit questions in light of the proximity of *Minjinia* to the gnathostome crown. Isolated  
204 examples of trabecular bone, typically restricted to a small region of the neurocranium, have  
205 historically been reported in boreaspid osteostracans<sup>15,30</sup>, buchanoosteid arthrodiroids<sup>31</sup> and  
206 petalichthyids<sup>32</sup>. However, these reports have all been dismissed as misidentifications<sup>26</sup>,  
207 possibly representing the retreat of perichondral bone deposited during cartilage growth<sup>33</sup>.  
208 Most recently, trabeculae in supposed endoskeletal bones of *Bothriolepis* have been termed  
209 endochondral bone<sup>16</sup>, although the small scale of these is in line with ‘superficial’  
210 perichondral trabeculae seen elsewhere. In line with ref. 26, we found no evidence of  
211 endochondral bone in material of *Buchanosteus* held in the Natural History Museum,  
212 London, or indeed in any other ‘placoderms’ we have examined. The *Epipetalichthys*  
213 holotype (Museum für Naturkunde, Berlin specimen MB.f.132.1-3) shows an apparently  
214 spongiose infilling in the anterior region of the braincase, but the identity of this structure, or  
215 even whether it is biological, cannot be determined.

216 Does endochondral bone have a deep origin within the gnathostome stem group? This  
217 would imply repeated losses of this tissue. We do find some statistical support for this  
218 hypothesis (Fig. 3, Extended Data Figs. 6, 7; Extended Data Table 1), and the model is well  
219 justified on prior phylogenetic and biological grounds. Endochondral bone has long been  
220 known to be inconsistently developed across ‘primitive’ bony fishes: incomplete or entirely  
221 absent ossification of the endoskeleton is known in both Palaeozoic actinopterygians<sup>34</sup> and  
222 sarcopterygians<sup>35</sup>, as well as more recent taxa<sup>36</sup>. The frequent absence of endochondral bone  
223 is considered secondary, and other controlling factors such as body size, maturity, mechanical  
224 stress, and buoyancy can determine its degree of development<sup>1</sup>. Our findings are also in  
225 agreement with studies establishing a genetic basis for secondary loss of all bone types within  
226 chondrichthyans<sup>5,37,38</sup>, with the failure to produce endochondral bone likely representing  
227 arrested development of chondrocytes as opposed to a primary lack of ability<sup>6</sup>.

228 Another confounding factor in this question is the problem of ‘placoderm’  
229 relationships. Although currently resolved as a deeply pectinate grade along the gnathostome  
230 stem, the backbone of this arrangement has poor statistical support and there is a lack of  
231 consistency in the arrangement of plesia. *Minjinia* itself highlights this uncertainty, given its  
232 highly unexpected character combinations. Notwithstanding its endochondral bone and  
233 crown-gnathostome-like inner ear structure, it strongly resembles ‘acanthothoracids’—the  
234 ‘placoderms’ widely considered among the most removed from the gnathostome crown (i.e.  
235 most ‘primitive’). This apparent character conflict could perhaps be more easily reconciled  
236 with a more coherent (though not necessarily monophyletic) ‘placoderm’ assemblage.  
237 Indeed, the highly pectinate structure of the ‘placoderm’ grade seems symptomatic of an  
238 overemphasis on characters and taxa resembling the crown group, thereby undersampling  
239 characters that could stabilise a clear picture of ‘placoderm’ interrelationships.

240 *Minjinia* reveals new data on ‘placoderm’ endoskeleton and tissue diversity from  
241 Mongolia—an otherwise extremely poorly known biogeographic realm for early  
242 gnathostomes. The phylogenetic placement of this ‘acanthothoracid’-like taxon crownward of  
243 all non-maxillate ‘placoderms’, in conjunction with possession of extensive endochondral  
244 bone, highlights the importance of material from traditionally undersampled geographic  
245 areas. The presence of endochondral bone renews the hypothesis that this tissue is  
246 evolutionarily ancient and was lost secondarily in chondrichthyans<sup>7,8</sup>. This view is overall  
247 consistent with evidence of generalised bone loss in chondrichthyans, potentially as a result  
248 of the suppression of bone-generating molecular genetic pathways<sup>6,38</sup>. Continued work in  
249 Mongolia and re-evaluation of phylogenetic datasets will be necessary to address this, with  
250 the results likely to lead to substantial re-evaluation of gnathostome phylogeny.

251

252 **Acknowledgements.** M. Bolortsetseg generously assisted MDB with contacts and field  
253 experience in Mongolia. Fieldwork was supported by National Geographic Society grants  
254 CRE 8769-10 and GEFNE35-12 to MDB. ALJ’s field contributions were supported by funds  
255 from the Anna Maria Lundin’s stipend from Smålands Nation, Uppsala University. RS’s field  
256 contributions were supported by a Royal Society Research Grant and the University of  
257 Manchester. The majority of this work was supported by the European Research Council  
258 (ERC) under the European Union’s Seventh Framework Programme (FP/2007-2013)/ERC  
259 Grant Agreement number 311092 to MDB. RPD was also supported by the Île-de-France  
260 DIM (domaine d’intérêt majeur) matériaux anciens et patrimoniaux grant PHARE. Stig  
261 Walsh is thanked for access and loan of specimen at the National Museums of Scotland.



262 Synchrotron tomography was performed at the ESRF (application LS 2451) with the  
263 assistance of Paul Tafforeau. SG was supported by a Royal Society Dorothy Hodgkin  
264 Research Fellowship. Matt Friedman is thanked for undertaking the X-ray computed  
265 microtomography analysis. TNT was made available with the support of the Willi Hennig  
266 Society.

267

268 **Author Contributions:** MDB conceived and designed the study. MDB, AJ, YAA, and EZ  
269 participated in all field seasons. RPD and AJ undertook preliminary CT scanning and  
270 segmentation that revealed the fossil was a ‘placoderm’ and had endochondral bone. RS  
271 discovered the first vertebrate remains in the first field season at Yamaat Gol in 2010. SG did  
272 most of the segmentation of *Minjinia* with input from MDB. AJ performed segmentation of  
273 *Diplacanthus* tissue. MC provided input on occipital comparative morphology of  
274 ‘placoderms’. RPD provided data and comparative analyses and data for endoskeletal tissue.  
275 YAA provided background on the geology, palaeontology, and stratigraphy of the type  
276 location; EZ and YAA organized field logistics and permitting. MDB, SG, MC, RPD, and AJ  
277 undertook the anatomical interpretation and prepared the figures. MDB and SG conducted the  
278 phylogenetic analyses. RS conducted the parsimony branch support analyses. TG wrote the  
279 script for generating MrBayes partitions from TNT’s character fits table and conducted the  
280 likelihood and model-fitting analyses. The manuscript was written by MDB, RPD, and SG.

281

282 **Author Information:**

283

284 Correspondence and requests for materials should be addressed to

285 [m.brazeau@imperial.ac.uk](mailto:m.brazeau@imperial.ac.uk).

286

287

288 **Methods**

289

290 **X-ray computed microtomography.** We scanned MPC-FH100/9.1 using the Nikon XT  
291 225s at the Museum of Paleontology, University of Michigan with the following parameters:  
292 200kV, 140 $\mu$ A, over 3123 projections and a voxel size of 32.92 $\mu$ m. We conducted  
293 segmentation using Mimics 19.0 (<http://biomedical.materialise.com/mimics>; Materialise,  
294 Leuven, Belgium) and we imaged models for publication using Blender  
295 (<https://www.blender.org>).

296 **Synchrotron light propagation phase contrast tomography.** We imaged *Diplacanthus*  
297 *crassismus* specimen NMS 1891.92.334 on Beamline 19 of the European Synchrotron  
298 Radiation Facility, using propagation phase-contrast synchrotron microtomography. We  
299 performed a spot scan with an energy of 116keV, achieving a voxel size of 0.55  $\mu\text{m}$ . We  
300 processed the resulting tomograms using VG StudioMax 2.2 (Volume Graphics, Germany),  
301 and prepared images in Blender.

302 **Phylogenetic analysis.** We conducted a parsimony analysis using TNT 1.5<sup>39</sup> and Bayesian  
303 analysis using MrBayes v 3.2.7<sup>40</sup>. The dataset consisted of 95 taxa and 284 discrete  
304 characters based on a pre-existing dataset<sup>41</sup>. We employed Osteostraci and Galeaspida as  
305 composite outgroups. We conducted parsimony analysis using both equal weights and  
306 implied weights methods. Global settings were 1000 search replicates and a hold of up to 1  
307 million trees. Equal weights parsimony analyses were conducted using the ratchet with  
308 default settings. Implied weights parsimony used a concavity parameter of 3 and the search  
309 was without the ratchet. Command lists are included in Supplementary Information. We  
310 conducted Bayesian analysis using both a partitioned and unpartitioned dataset. We used the  
311 Mkv model<sup>42</sup> and gamma rate distribution. We ran the analyses for 5 million generations  
312 with a relative burn-in fraction of 0.25. Runs were checked for convergence using Tracer<sup>43</sup>.  
313 We partitioned the dataset using a newly proposed method<sup>24</sup> that partitions the data according  
314 to homoplasy levels. Using the results of implied weights parsimony conducted in TNT, we  
315 created a text table of character fit values. We wrote an R<sup>44</sup> script to generate a list of  
316 partition commands for MrBayes. To reduce the number of partitions with small numbers of  
317 characters, we concatenated the partitions by rounding the fitness scores to 2 significant  
318 figures, yielding 10 individual partitions.

319 We assessed parsimony ancestral states visually using Mesquite<sup>45</sup>. Likelihood and  
320 Bayesian ancestral states were estimated in R using the castor package<sup>46</sup>. Prior to calculating  
321 likelihood ancestral states on parsimony trees, we scaled branch lengths using PAUP\*<sup>47</sup> and  
322 calculated the likelihood scores for all of the trees under the Mkv model. The trees were then  
323 exported with branch lengths. To account for overall uncertainty in tree estimates, we  
324 estimated ancestral states on 100 trees randomly selected from the fundamental set of most  
325 parsimonious trees and two times 50 trees selected from the 75% last trees of each posterior  
326 tree distribution from the Bayesian analysis. We then run an ancestral states estimation Mk  
327 model (using the castor R package) using both the Equal Rates (ER) and All Rates Different  
328 (ARD) models. This resulted in 400 ancestral states estimations. For each estimation we  
329 extracted the overlap log likelihood, the AIC (counting one parameter for the ER model and

330 two for the ARD model) and the scaled log likelihood (probability) for the presence and  
331 absence of the endochondral bone character (character 4) for the last common node of  
332 *Minjinia* and crown-group gnathostomes. We present the median value of these distributions  
333 of the estimations overall log likelihoods, AICs and presence or absence of endochondral  
334 bone in Extended Data Table 1.

335

#### 336 **Data availability**

337 The holotype specimen of *Minjinia turgenensis* will be permanently deposited in the  
338 collections of the Institute of Paleontology, Mongolian Academy of Sciences. Original  
339 tomograms are available at (doi:10.6084/m9.figshare.12301229) and rendered models are  
340 available at (doi:10.6084/m9.figshare.12301223). The phylogenetic character list and dataset  
341 are available as Supplementary Information S1 and S2. The LifeScience Identifier for  
342 *Minjinia turgenensis* is urn:lsid:zoobank.org:act:82A1CEEC-B990-47FF-927A-  
343 D2F0B59AEA87

344

#### 345 **Code availability**

346 R code for generating partitions based on character fits and code for likelihood ancestral  
347 states reconstructions and plots are available in the Supplementary Information.

348

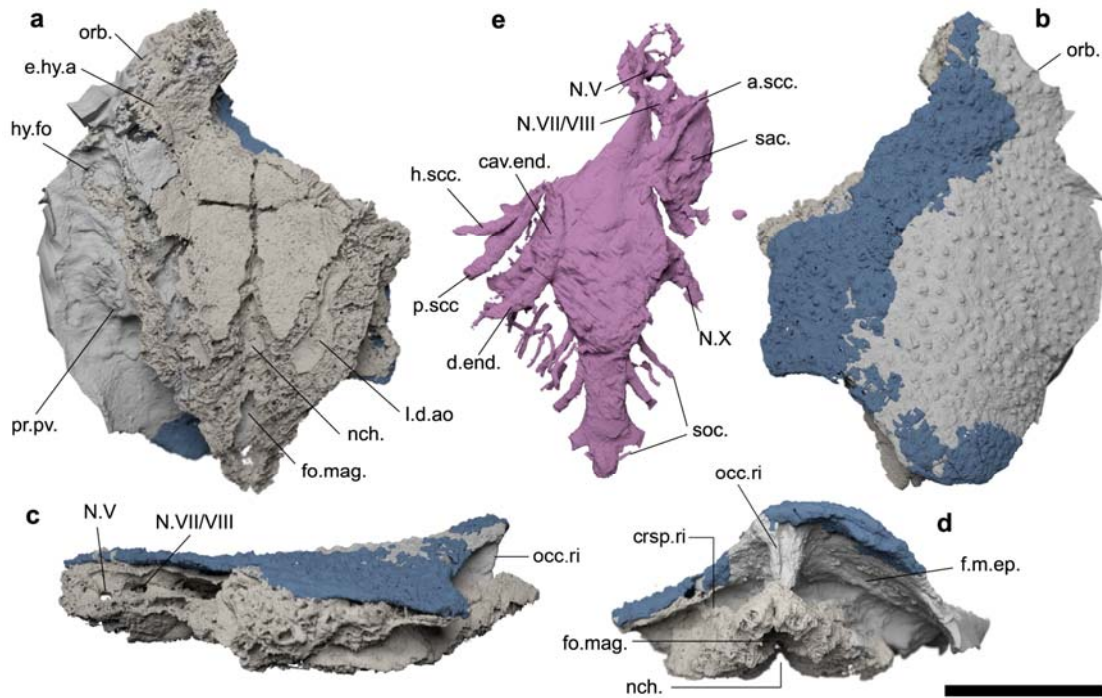

349

350 **Fig. 1 | MPC-FH100/9.1 a 'placoderm' skull roof and braincase from the Early**  
351 **Devonian of Mongolia. a, Ventral view. b, Dorsal view. c, Left lateral view. d, Posterior**  
352 **view. e, Braincase endocavity in dorsal view. Taupe: endoskeleton; grey: mould; pink:**  
353 **endocavity; blue: exoskeleton. a.scc., anterior semicircular canal; cav.end., endolymphatic**  
354 **cavity; crsp.ri, craniospinal ridge; d.end., endolymphatic duct; e.hy.a., sulcus for the efferent**  
355 **hyoid artery; f.m.ep., epaxial muscle fossa; fo.mag., foramen magnum; h.scc., horizontal**  
356 **semicircular canal; l.d.ao, sulcus for the lateral dorsal aorta; N.V, trigeminal nerve canal;**  
357 **N.VII, facial nerve canal; N.VIII, acoustic nerve canal; N.X, vagus nerve canal; nch.,**  
358 **notochordal canal; occ.ri, occipital ridge; orb., orbit; p.scc, posterior semicircular canal;**  
359 **pr.pv., paravagal process; sac., saccus; soc., spino-occipital nerve canals. Scale bar, 20 mm.**

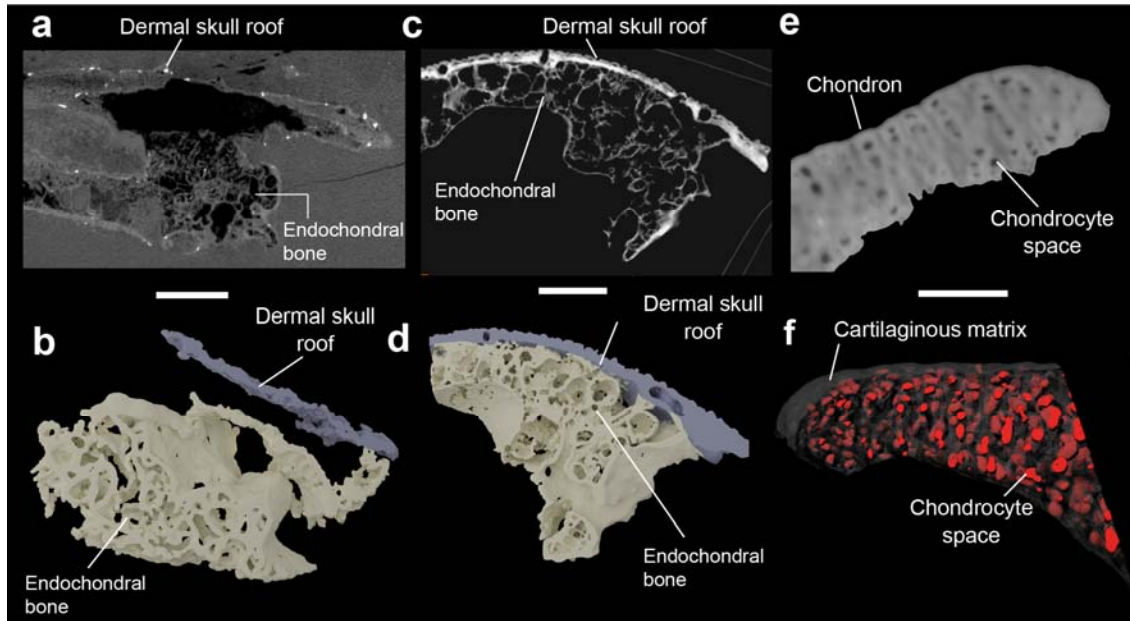

360

361 **Fig. 2 | Endoskeletal mineralisation in fossil gnathostomes.** **a**, Transverse tomographic  
362 slice through MPC-FH100/9.1. **b**, Three-dimensional rendering of trabecular bone structure.  
363 **c**, Transverse tomographic section through the braincase of the osteichthyan *Ligulalepis*. **d**,  
364 Three-dimensional rendering of the trabecular bone in *Ligulalepis* (**c** and **d** use data from<sup>41</sup>).  
365 **e**, Synchrotron tomography image of the calcified cartilage of the stem-group chondrichthyan  
366 *Diplacanthus crassissimus* specimen NMS 1891.92.334. **f**, Semi-transparent three-  
367 dimensional structure of calcified cartilage of NMS 1891.92.334. Scale bars, **a** and **b**, 10 mm;  
368 **c** and **d**, 1 mm ; **e** and **f**, 150 µm.

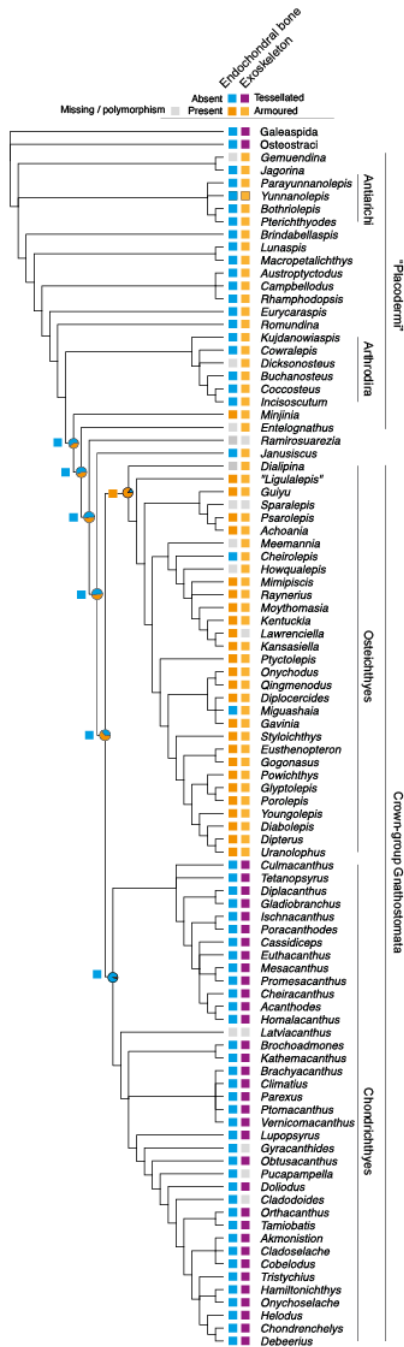

369

370 **Fig. 3 | Summary phylogenetic relations of early gnathostomes showing distribution of**  
 371 **endochondral bone and exoskeletal armour.** Squares at nodes indicate parsimony  
 372 reconstruction for endochondral bone. Pie charts at nodes show likelihood reconstructions for  
 373 the same character under the all-rates-different model (see Extended Data Figs 6 & 7 for  
 374 competing reconstructions). Grey box indicates uncertainty. Loss of endochondral bone maps  
 375 closely with generalised loss of bone in chondrichthyes where exoskeletal armour and  
 376 perichondral bone are also absent.

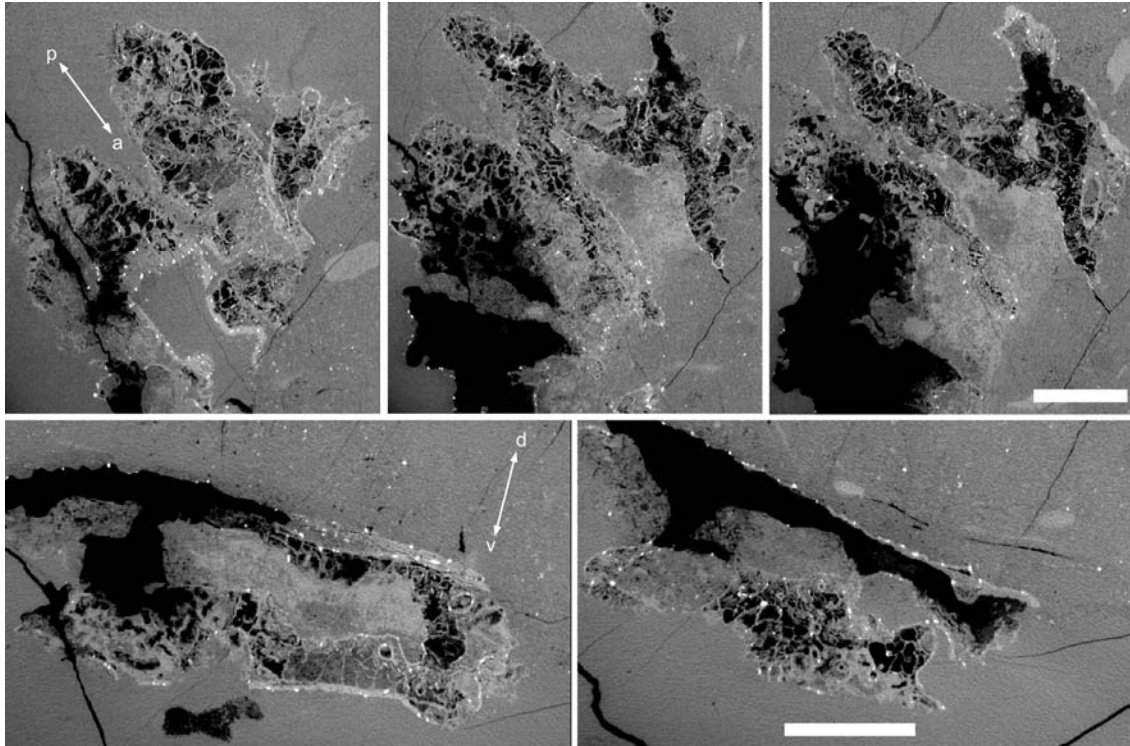

377

378 **Extended Data Fig. 1 | Tomograms of endoskeletal ossification in *Minjinia*.** Top row:  
379 semi-coronal sections through braincase. Double-headed arrows indicate anterior-posterior  
380 (a-p) dorsal-ventral (d-v) axes. Bottom row: semi-transverse sections through posterior part  
381 of endocranium. Voids of black space represent mouldic preservation. Scale bars, 10 mm and  
382 apply across each row of panels.

383

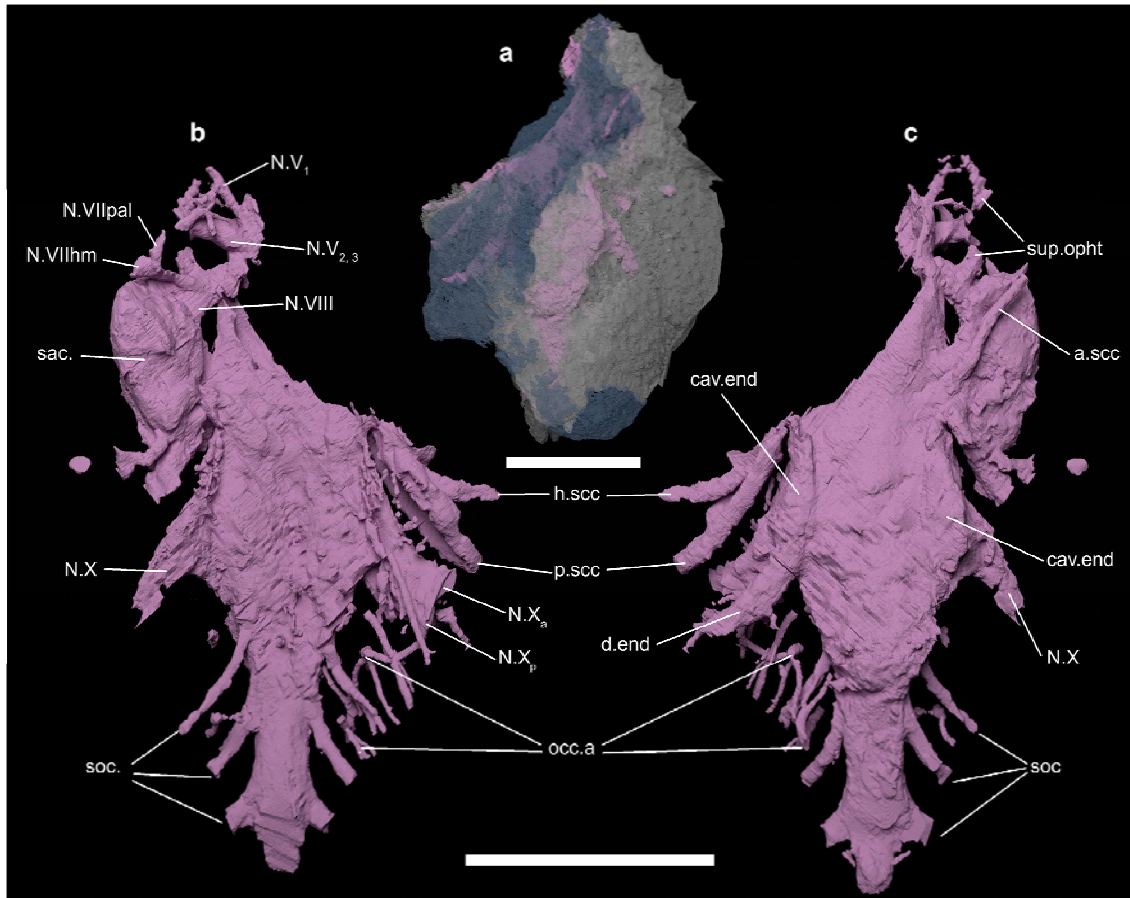

384

385 **Extended Data Fig. 2 | Braincase endocavity of *Minjinia*.** **a**, Semi-transparent rendering of  
386 skull roof and braincase (grey and blue) showing extent of endocavity (pink). **b**, Ventral  
387 view. **c**, Dorsal view. a.scc., anterior semicircular canal; cav.end., endolymphatic cavity;  
388 d.end., endolymphatic duct; h.scc., horizontal semicircular canal; l.d.ao., sulcus for the lateral  
389 dorsal aorta; N.V, trigeminal nerve canal; N.VIIhm, hyomandibular branch of facial nerve  
390 canal; N.VIIpal, palatine branch of facial nerve canal; N.VIII, acoustic nerve canal; N.X,  
391 vagus nerve canal, N.X<sub>a</sub>, anterior branch of vagus nerve canal; N.X<sub>p</sub>, posterior branch of  
392 vagus nerve canal; occ.a, occipital artery canals; p.scc, posterior semicircular canal; sac.,  
393 sacculus; soc., spino-occipital nerve canals; sup.opht, canal for supra-ophthalmic nerve. Scale  
394 bars, 20 mm (upper scale bar associates with **a**, lower scale bar associates with **b** and **c**).

395

396



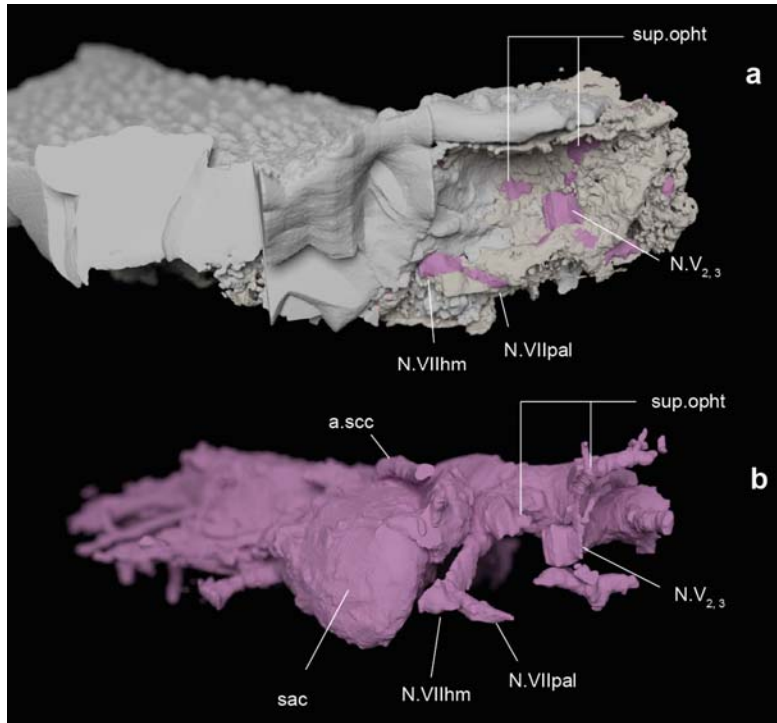

397

398 **Extended Data Fig. 3 | Right orbital wall and innervation pattern of *Minjinia*.** **a**, orbit in

399 anterolateral view showing disposition of nerve openings (pink infill). **b**, endocast in the

400 same perspective showing the relationship between never canals and endocast.

401

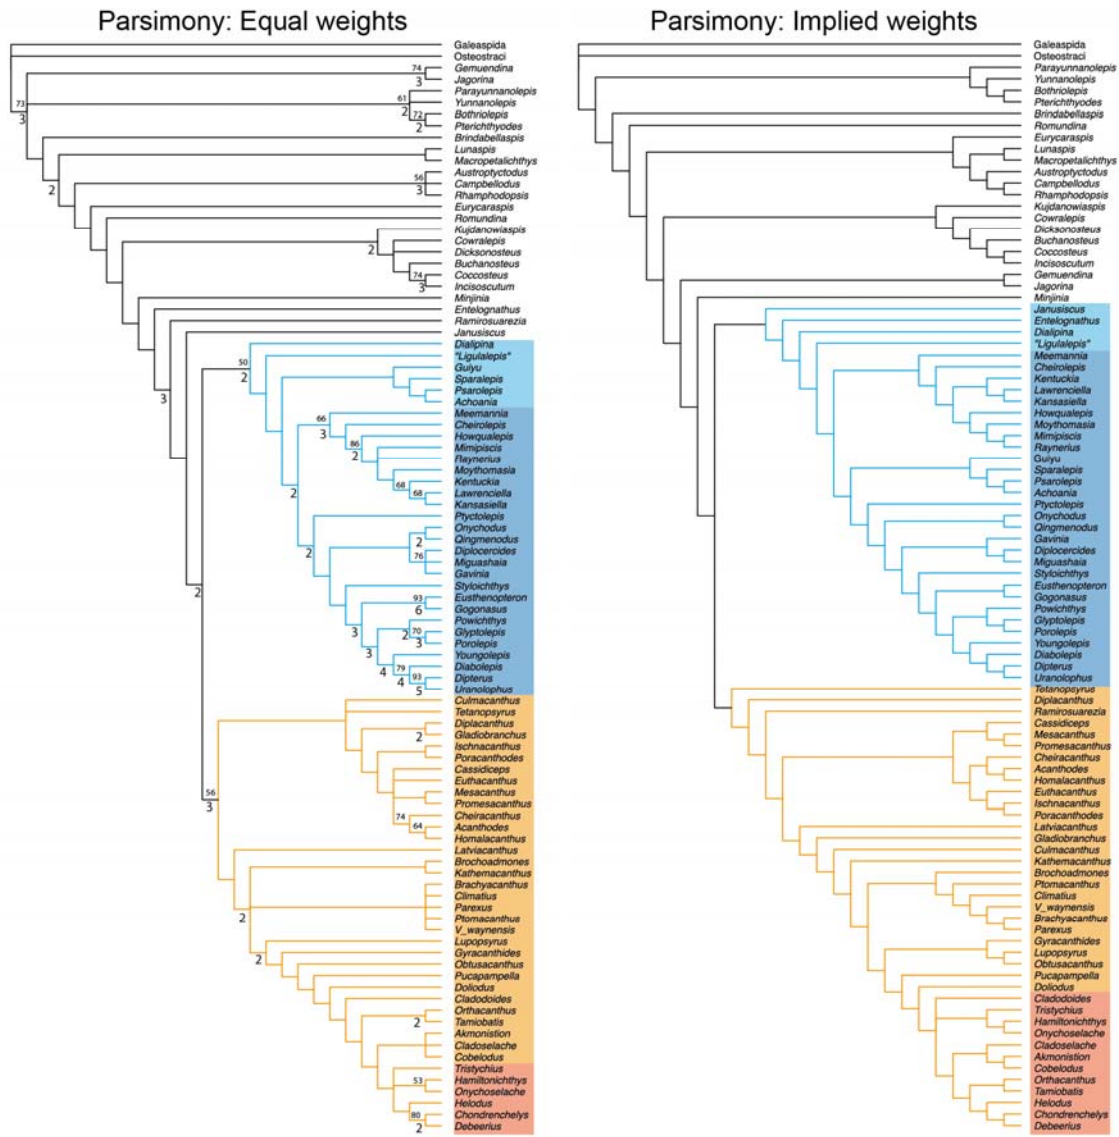

402

403 **Extended Data Fig. 4 | Results of phylogenetic parsimony analysis.** Dataset consists of 95  
 404 taxa and 284 characters. Both trees are strict consensus topologies. Equal weights parsimony  
 405 analysis using the ratchet resulted in 240 trees with a length of 832 steps. Implied weights  
 406 parsimony analysis using random addition sequence + branch-swapping resulted in two  
 407 optimal trees with score 85.23240. Double-digit figures above internal branches are bootstrap  
 408 values of 50% and over; single-digit figures below branches are Bremer decay index values.  
 409 Blue shading: osteichthyan total group (dark blue: crown group); orange shading:  
 410 chondrichthyan total group (dark orange: crown group).

411

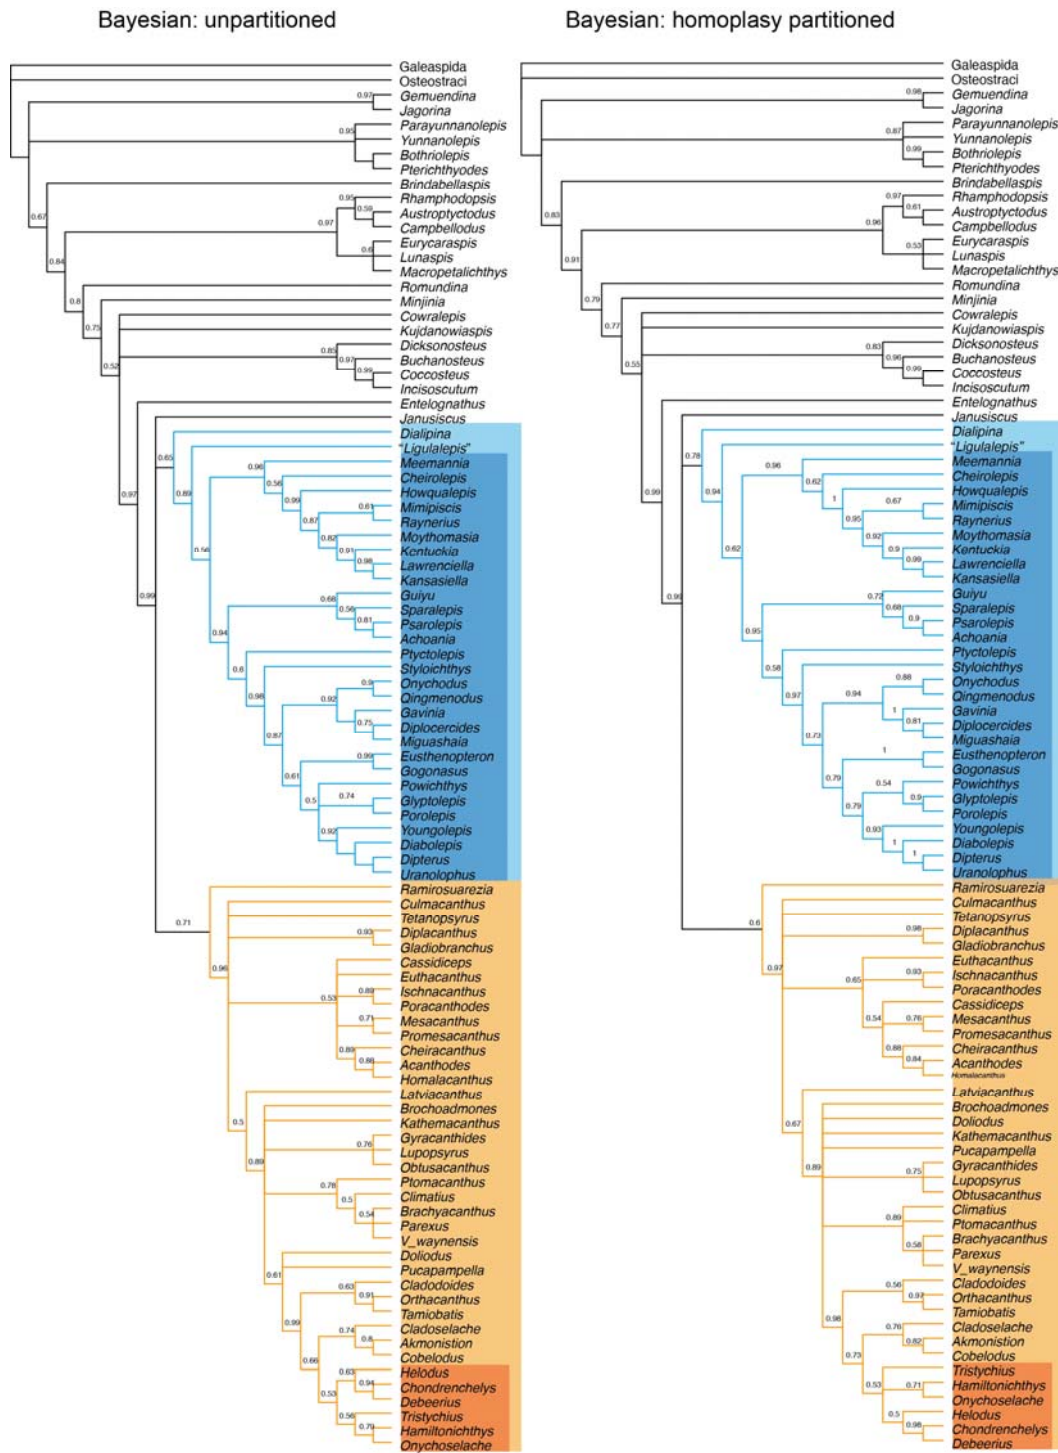

412

413 **Extended Data Fig. 5 | Results of Bayesian phylogenetic analysis using both partitioned**  
 414 **and unpartitioned data.** Majority-rules consensus trees with posterior probabilities shown  
 415 along branches. Blue shading: osteichthyan total group (dark blue: crown group); orange  
 416 shading: chondrichthyan total group (dark orange: crown group).

417

Endochondral bone estimation  
(parsimony – ARD)

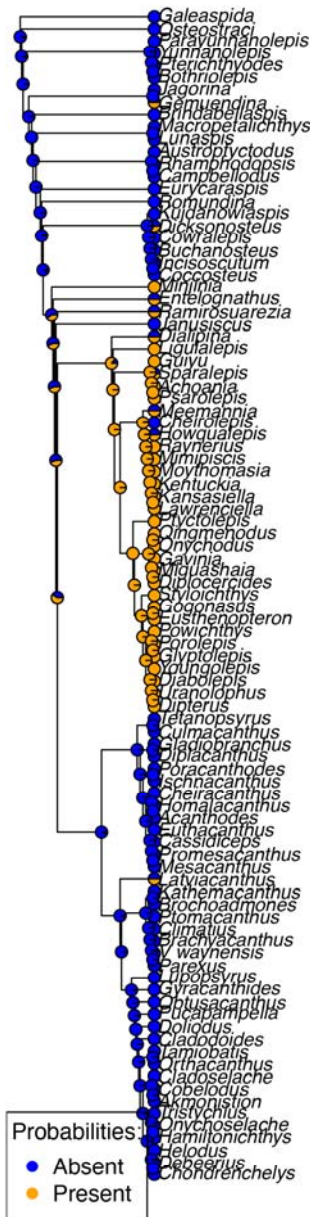

Endochondral bone estimation  
(parsimony – ER)

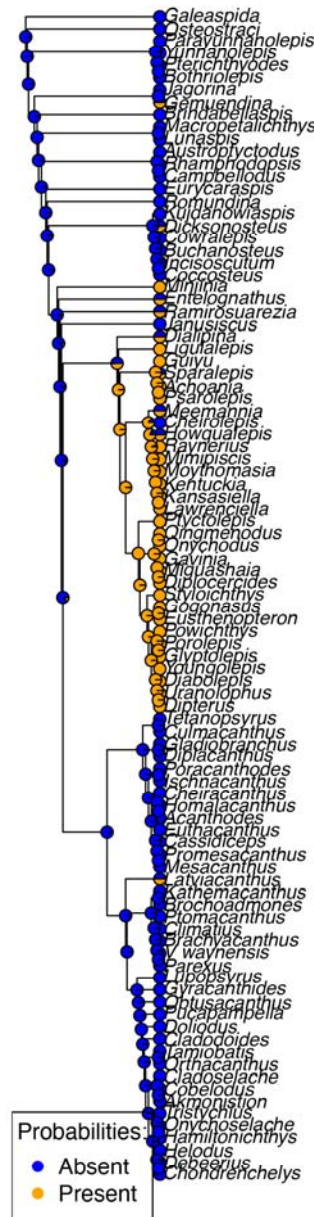

418

419 **Extended Data Fig. 6 | Likelihood ancestral state mapping of endochondral bone on**

420 **equal weights parsimony results.** ARD, all rates different model; ER, equal rates model.

### Endochondral bone estimation (bayesian – ARD)

### Endochondral bone estimation (bayesian – ER)

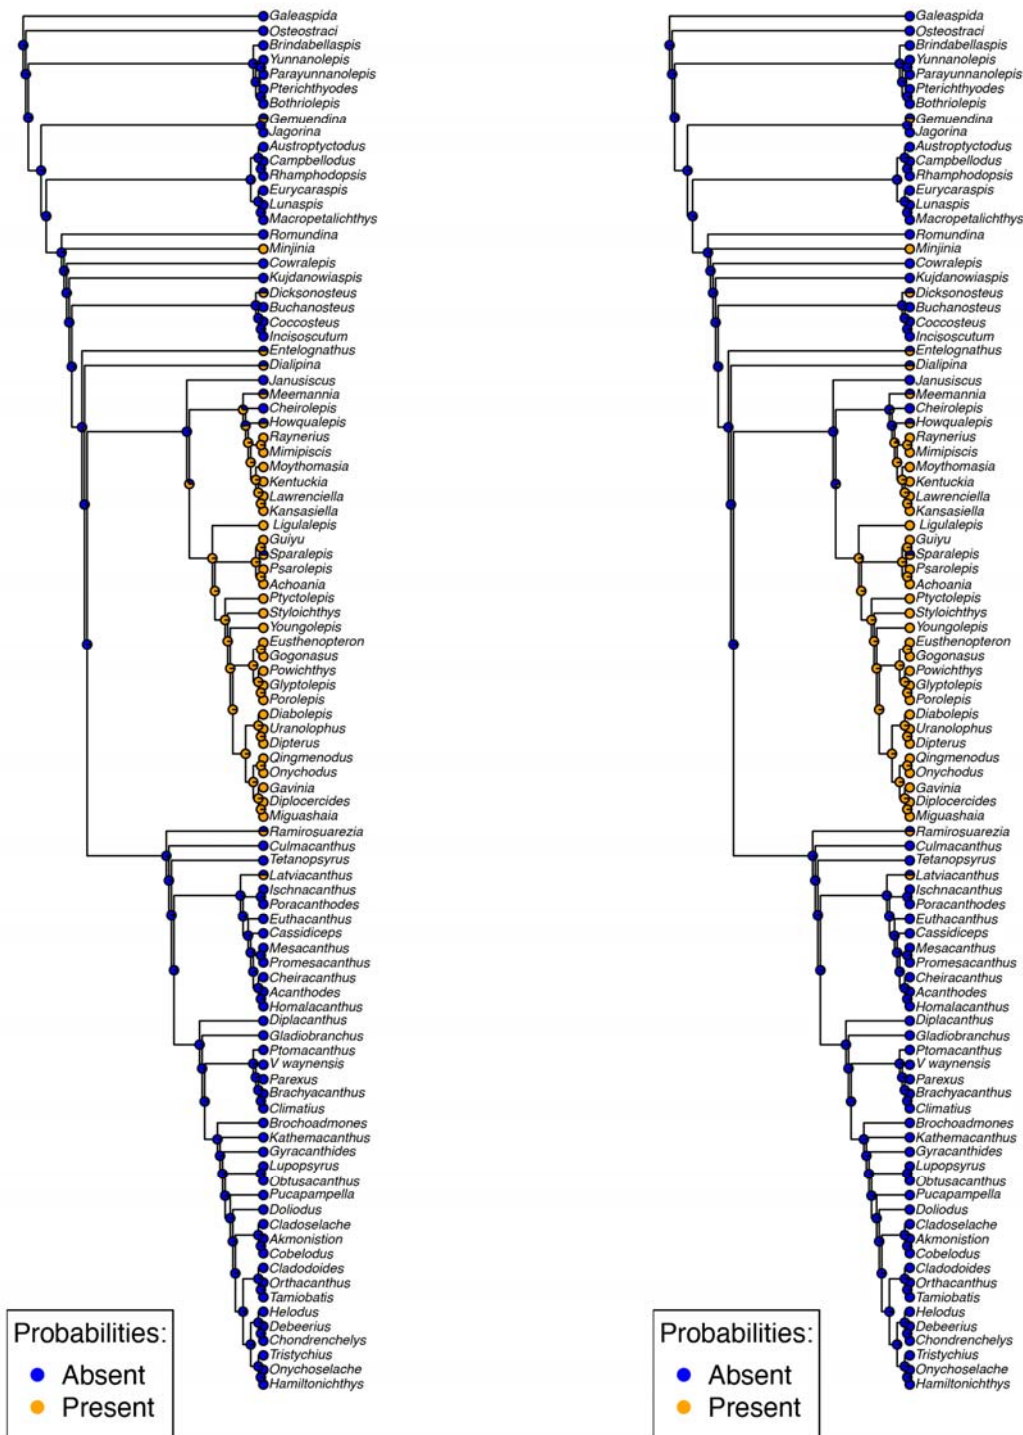

421

422

423

424

**Extended Data Fig. 7 | Likelihood ancestral state mapping of endochondral bone on unpartitioned Bayesian analysis results. ARD, all rates different model; ER, equal rates model.**

425 **Extended Data Table 1 | Tree distribution (100) ancestral states estimation results.** ER =  
426 Equal rates model; ARD = All Rates Different model. The columns AIC and log.lik represent  
427 the median AIC and log.lik across the 100 parsimony and bayesian trees (for both models).  
428 The columns Absent and Present represent the median scaled likelihood for the endochondral  
429 bone state.

| Node                                | Tree      | Model | log.lik | AIC   | Absent | Present |
|-------------------------------------|-----------|-------|---------|-------|--------|---------|
| <i>Minjinia</i> :crown gnathostomes | Parsimony | ER    | -27.60  | 57.20 | 0.94   | 0.06    |
|                                     |           | ARD   | -25.47  | 54.93 | 0.61   | 0.39    |
|                                     | Bayesian  | ER    | -29.94  | 61.89 | 0.98   | 0.02    |
|                                     |           | ARD   | -27.69  | 59.38 | 0.82   | 0.18    |

430

431

## 432 **References**

433

- 434 1. Hall, B. K. *Bones and Cartilage*. (Academic Press, 2005).
- 435 2. Janvier, P. *Early Vertebrates*. (Oxford University Press, 1996).
- 436 3. Friedman, M. & Brazeau, M. A Reappraisal of the Origin and Basal Radiation of the  
437 Osteichthyes. *J Vertebr Paleontol* **30**, 36–56 (2010).
- 438 4. Brazeau, M. D. & Friedman, M. The characters of Palaeozoic jawed vertebrates. *Zool*  
439 *J Linn Soc* **170**, 779–821 (2014).
- 440 5. Eames, B. F. *et al.* Skeletogenesis in the swell shark *Cephaloscyllium ventriosum*.  
441 *Journal of Anatomy* **210**, 542–554 (2007).
- 442 6. Marconi, A., Hancock-Ronemus, A. & Gillis, J. A. Adult chondrogenesis and  
443 spontaneous cartilage repair in the skate, *Leucoraja erinacea*. *eLife Sciences* **9**, 2813  
444 (2020).
- 445 7. Maisey, J. G. Heads and tails: a chordate phylogeny. *Cladistics* **2**, 201–256 (1986).
- 446 8. Zhu, M. Bone gain and loss: insights from genomes and fossils. *Natl Sci Rev* **1**, 490–  
447 492 (2014).
- 448 9. Alekseeva, R. E., Mendbayar, B. & Erlanger, O. A. *Brachiopods and Biostratigraphy*  
449 *of the Lower Devonian of Mongolia*. **16**, (Nauka, 1981).
- 450 10. Alekseeva, R. E. *Devonian Biostratigraphy of Mongolia*. (Nauka, 1993).
- 451 11. Mark-Kurik, E. in *Morphology, Phylogeny and Paleobiogeography of Fossil Fishes*  
452 (eds. Elliott, D. K., Maisey, J., Yu, X. & Miao, D.) 101–106 (2010).
- 453 12. Stensiö, E. A. Contributions to the knowledge of the vertebrate fauna of the Silurian  
454 and Devonian of western Podolia. II. Notes on two arthrodires from the Downtonian of  
455 Podolia. **35A**, 1–83 (1944).
- 456 13. Ørvig, T. Description, with special reference to the dermal skeleton, of a new radotinid  
457 arthrodire from the Gedinnian of Arctic Canada. *Colloque international C.N.R.S. no.*  
458 *218* 43–71 (1975).
- 459 14. Vaškaninová, V. & Ahlberg, P. E. Unique diversity of acanthothoracid placoderms  
460 (basal jawed vertebrates) in the Early Devonian of the Prague Basin, Czech Republic:  
461 A new look at Radotina and Holopetalichthys. *PLoS ONE* **12**, e0174794 (2017).

- 462 15. Wängsjö, G. The Downtonian and Devonian vertebrates of Spitsbergen. IX. *Norsk*  
463 *Polarinstitut Skrifter* **97**, 1–611 (1952).
- 464 16. Charest, F., Johanson, Z. & Cloutier, R. Loss in the making: absence of pelvic fins and  
465 presence of paedomorphic pelvic girdles in a Late Devonian antiarch placoderm  
466 (jawed stem-gnathostome). *Biology Letters* **14**, 20180199 (2018).
- 467 17. Dupret, V., Sanchez, S., Goujet, D. & Ahlberg, P. E. The internal cranial anatomy of  
468 *Romundina stellina* Ørvig, 1975 (Vertebrata, Placodermi, Acanthothoraci) and the  
469 origin of jawed vertebrates—Anatomical atlas of a primitive gnathostome. *PLoS ONE*  
470 **12**, e0171241 (2017).
- 471 18. Olive, S., Goujet, D., Lelièvre, H. & Janjou, D. A new Placoderm fish  
472 (Acanthothoraci) from the Early Devonian Jauf Formation (Saudi Arabia).  
473 *Geodiversitas* **33**, 393–409 (2011).
- 474 19. Stensiö, E. A. La cavité labyrinthique, l'ossification sclérotique et l'orbite de *Jagorina*.  
475 *Colloques internationaux du Centre national de la Recherche scientifique* **21**, 9–43  
476 (1950).
- 477 20. Stensiö, E. A. Anatomical studies on the arthrodiran head. *K Sven Vetenskapsakad*  
478 *Handl* **9**, 1–419 (1963).
- 479 21. Goujet, D. *Les poissons placodermes du Spitsberg*. (Cahiers de Paléontologie, Editions  
480 du CNRS, 1984).
- 481 22. Davis, S. P., Finarelli, J. A. & Coates, M. I. *Acanthodes* and shark-like conditions in  
482 the last common ancestor of modern gnathostomes. *Nature* **486**, 247–250 (2012).
- 483 23. Castiello, M. & Brazeau, M. D. Neurocranial anatomy of the petalichthyid placoderm  
484 *Shearsbyaspis oepiki* Young revealed by X-ray computed microtomography.  
485 *Palaeontology* **21**, 754 (2018).
- 486 24. Rosa, B. B., Melo, G. A. R. & Barbeitos, M. S. Homoplasy-Based Partitioning  
487 Outperforms Alternatives in Bayesian Analysis of Discrete Morphological Data.  
488 *Systematic Biology* **54**, 373 (2019).
- 489 25. Rosen, D. E., Forey, P. L., Gardiner, B. G. & Patterson, C. Lungfishes, tetrapods,  
490 paleontology, and plesiomorphy. *Bull Am Mus Nat Hist* **167**, 159–276 (1981).
- 491 26. Gardiner, B. G. The relationships of the palaeoniscid fishes, a review based on new  
492 specimens of *Mimia* and *Moythomasia* from Upper Devonian of Western Australia.  
493 *Bull Br Mus nat Hist (Geol)* **37**, 173–428 (1984).
- 494 27. Zhu, M. *et al.* A Silurian placoderm with osteichthyan-like marginal jaw bones. *Nature*  
495 **502**, 188–193 (2013).
- 496 28. Giles, S., Friedman, M. & Brazeau, M. D. Osteichthyan-like cranial conditions in an  
497 Early Devonian stem gnathostome. *Nature* **520**, 82–85 (2015).
- 498 29. Miles, R. S. in *Interrelationships of Fishes* (eds. Greenwood, P. H., Miles, R. S. &  
499 Patterson, C.) 63–103 (Academic Press London, 1973).
- 500 30. Janvier, P. *Les céphalaspides du Spitsberg*. (Éditions du Centre National de la  
501 Recherche Scientifique, 1985).
- 502 31. Young, G. C. New information on the structure and relationships of *Buchanosteus*  
503 (Placodermi: Euarthrodira) from the Early Devonian of New South Wales. *Zool J Linn*  
504 *Soc* **66**, 309–352 (1979).
- 505 32. Stensiö, E. A. On the head of the macropetalichthyids. *Field Museum of Natural*  
506 *History Publication Geological Series* **4**, 87–197 (1925).
- 507 33. Ørvig, T. Notes on some Paleozoic lower vertebrates from Spitsbergen and North  
508 America. *Norsk Geologisk Tidsskrift* **37**, 285–353 (1957).
- 509 34. Schaeffer, B. The braincase of the holostean fish *Macrepistius*, with comments on  
510 neurocranial ossification in the Actinopterygii. *American Museum Novitates* **2459**, 1–  
511 34 (1971).

- 512 35. Cloutier, R. in *Devonian Fishes and Plants* (eds. Schultze, H.-P. & Cloutier, R.) 227–  
513 247 (Verlag Dr. Friedrich Pfeil, 1996).
- 514 36. Grande, L. & Bemis, W. E. Osteology and Phylogenetic Relationships of Fossil and  
515 Recent Paddlefishes (Polyodontidae) with Comments on the Interrelationships of  
516 Acipenseriformes. *Memoir (Society of Vertebrate Paleontology)* **11 (Supplement to**  
517 **Number 1)**, 1–121 (1991).
- 518 37. Venkatesh, B. *et al.* Elephant shark genome provides unique insights into gnathostome  
519 evolution. *Nature* **505**, 174–179 (2014).
- 520 38. Ryll, B., Sanchez, S., Haitina, T., Tafforeau, P. & Ahlberg, P. E. The genome of  
521 *Callorhinchus* and the fossil record: a new perspective on SCPP gene evolution in  
522 gnathostomes. *Evolution & Development* **16**, 123–124 (2014).
- 523 39. Goloboff, P. A. & Catalano, S. A. TNT version 1.5, including a full implementation of  
524 phylogenetic morphometrics. *Cladistics* **32**, 221–238 (2016).
- 525 40. Ronquist, F. & Huelsenbeck, J. P. MrBayes 3: Bayesian phylogenetic inference under  
526 mixed models. *Bioinformatics* **19**, 1572–1574 (2003).
- 527 41. Clement, A. M. *et al.* Neurocranial anatomy of an enigmatic Early Devonian fish sheds  
528 light on early osteichthyan evolution. *eLife Sciences* **7**, e34349 (2018).
- 529 42. Lewis, P. O. A likelihood approach to estimating phylogeny from discrete  
530 morphological character data. *Systematic Biology* **50**, 913 (2001).
- 531 43. Rambaut, A., Drummond, A. J., Xie, D., Baele, G. & Suchard, M. A. Posterior  
532 Summarization in Bayesian Phylogenetics Using Tracer 1.7. *Systematic Biology* **67**,  
533 901–904 (2018).
- 534 44. R Core Team. *R: A language and environment for statistical computing.* (R  
535 Foundation for Statistical Computing, 2019).
- 536 45. Maddison, D. R. & Maddison, W. P. *Mesquite.* (2019).
- 537 46. Louca, S. & Doebeli, M. Efficient comparative phylogenetics on large trees.  
538 *Bioinformatics* **34**, 1053–1055 (2017).
- 539 47. Swofford, D. L. *PAUP\**. 4.0a166, (2019).
- 540
- 541
